# Supplementary material for: Association of Choroid Plexus Enlargement With Cognitive, Inflammatory, and Structural Phenotypes Across the Psychosis Spectrum
Source: Atypon-hosted journal article supplement (doi:10.1176/appi.ajp.2019.18070825), 2019-06-05

**Supplementary Table S1: Group Sample Size by Clinical and Analyte Measure**

|                                                                    | Probands (n=554) | Relatives (n=522) | NC (n=333) |
|--------------------------------------------------------------------|------------------|-------------------|------------|
| PANSS                                                              | 537              | -                 | -          |
| SFS                                                                | 427              | 400               | 235        |
| BACS                                                               | 533              | 498               | 312        |
| TNF $\alpha$ , sFlt-1, VEGF, CRP, IL1b, IL6, IL8, IL10, IL12, IFNg | 107              | -                 | 57         |
| IL2                                                                | 97               | -                 | 46         |
| IL4                                                                | 91               | -                 | 46         |
| IL12p70                                                            | 88               | -                 | 46         |
| TGFb                                                               | 75               | -                 | 42         |

**Notes:** NC; normal control; PANSS, Positive and Negative Symptoms Scale; SFS, Social Functioning Scale; BACS, Brief Assessment of Cognition in Schizophrenia.

**Supplementary Table S2: Sample Characteristics of the Comparisons between Diagnostic Groups**

|                                             | Diagnostic Groups   |                     |                     |
|---------------------------------------------|---------------------|---------------------|---------------------|
|                                             | SZP (n=223)         | SADP (n=141)        | BPP (n=190)         |
| Age (mean, SD)                              | 35.1 (12.4)         | 35.5 (11.7)         | 36.1 (13.1)         |
| Sex (Male/Female) <sup>a</sup>              | 148/75              | 61/80               | 58/132              |
| Race (AA/CA/OT) <sup>a</sup>                | 106/101/16          | 59/74/8             | 41/138/11           |
| Daily CPZ equivalents (mean, SD)            | 485.3 (365.0)       | 519.5 (463.4)       | 326.5 (324.4)       |
| Duration of Illness (years) <sup>a</sup>    | 15.5 (11.8)         | 19.4 (11.6)         | 19.5 (12.7)         |
| Age of onset (years) <sup>a</sup>           | 19.3 (7.1)          | 16.2 (8.5)          | 16.7 (7.5)          |
| PANSS Total Score <sup>a</sup>              | 66.6 (16.8)         | 69.2 (15.5)         | 54.1 (14.4)         |
| ICV mm <sup>3</sup> (mean, SD) <sup>a</sup> | 1,474,720 (194,698) | 1,386,066 (177,887) | 1,427,089 (169,321) |

**Notes:** SD, standard deviation; AA, African American; OT, other; CA, Caucasian; BPP, psychotic bipolar I disorder; SADP, schizoaffective; SZP, schizophrenia; CPZ, chlorpromazine; PANSS, Positive and Negative Symptom Scales; ICV, intracranial volume; <sup>a</sup>, p<0.05.

**Supplementary Table 3: Mean Choroid Plexus Volume for Probands, Relatives, Diagnostic Groups and Healthy Controls**

|                      | Probands (n=554) |       | Relatives (n=522) |       | NC (n=333)  |       |
|----------------------|------------------|-------|-------------------|-------|-------------|-------|
|                      | Mean             | SD    | Mean              | SD    | Mean        | SD    |
| Left Choroid Plexus  | 548.2            | 171.1 | 519.2             | 173.2 | 503.1       | 168.8 |
| Right Choroid Plexus | 580.3            | 168.1 | 551.2             | 163.8 | 539.1       | 158.4 |
|                      | SZP (n=223)      |       | SADP (n=141)      |       | BPP (n=190) |       |
|                      | Mean             | SD    | Mean              | SD    | Mean        | SD    |
| Total Choroid Plexus | 1155.0           | 335.3 | 1108.5            | 313.3 | 1117.6      | 323.3 |

**Notes:** SD, standard deviation; NC, healthy control; BPP, psychotic bipolar I disorder; SADP, schizoaffective; SZP, schizophrenia.

**Supplementary Table S4: Pairwise Contrasts for Choroid Plexus Volume Across Psychosis Probands, Relatives, Diagnostic Groups, and Healthy Controls**

| Imaging Covariate (Volume, mm <sup>3</sup> ) | Region               | Probands vs NC |           | Probands vs Relatives |           | Relatives vs NC |           |
|----------------------------------------------|----------------------|----------------|-----------|-----------------------|-----------|-----------------|-----------|
|                                              |                      | q-value        | Cohen's d | q-value               | Cohen's d | q-value         | Cohen's d |
| ICV                                          | Left Choroid Plexus  | <0.001         | 0.335     | <0.001                | 0.226     | 0.142           | 0.114     |
| ICV                                          | Right Choroid Plexus | <0.001         | 0.301     | <0.001                | 0.205     | 0.195           | 0.099     |
| LV                                           | Left Choroid Plexus  | 0.026          | 0.193     | 0.189                 | 0.093     | 0.189           | 0.103     |
| LV                                           | Right Choroid Plexus | 0.049          | 0.162     | 0.189                 | 0.083     | 0.262           | 0.082     |
| LV and GMV                                   | Left Choroid Plexus  | 0.021          | 0.188     | 0.184                 | 0.089     | 0.186           | 0.103     |
| LV and GMV                                   | Right Choroid Plexus | 0.021          | 0.181     | 0.155                 | 0.101     | 0.267           | 0.082     |
|                                              | Region               | SZP vs NC      |           | SADP vs NC            |           | BPP vs NC       |           |
|                                              |                      | q-value        | Cohen's d | q-value               | Cohen's d | q-value         | Cohen's d |
| ICV                                          | Total Choroid Plexus | <0.001         | 0.315     | 0.001                 | 0.322     | <0.001          | 0.386     |
| LV                                           | Total Choroid Plexus | 0.028          | 0.192     | 0.2                   | 0.124     | 0.021           | 0.252     |
| LV and GM                                    | Total Choroid Plexus | 0.021          | 0.198     | 0.148                 | 0.136     | 0.016           | 0.259     |

**Notes:** NC, healthy control; BPP, psychotic bipolar I disorder; SADP, schizoaffective; SZP, schizophrenia; ICV, Total Intracranial Volume; LV, Lateral Ventricle; Gray Matter Volume, GMV. Covaried for age, sex, race, and site; q-value indicates FDR corrected p-values.

**Supplementary Table S5: Analyses for Choroid Plexus Volume in Axis II Relatives**

| Group Contrasts      |                      |           |                |           |
|----------------------|----------------------|-----------|----------------|-----------|
| Region               | Probands vs Axis IIR |           | Axis IIR vs NC |           |
|                      | q-value              | Cohen's d | q-value        | Cohen's d |
| Left Choroid Plexus  | 0.256                | 0.254     | 0.712          | 0.091     |
| Right Choroid Plexus | 0.712                | 0.053     | 0.256          | 0.246     |

  

| Partial Correlations with Choroid Plexus Volume in Axis IIR |         |              |
|-------------------------------------------------------------|---------|--------------|
| Measure                                                     | r-value | q-value      |
| Total Gray Matter                                           | 0.066   | 0.687        |
| Lateral Ventricle                                           | 0.429   | <b>0.028</b> |
| Cerebellum Cortex                                           | -0.146  | 0.687        |
| Hippocampus                                                 | -0.102  | 0.687        |
| Amygdala                                                    | -0.064  | 0.687        |
| Caudate                                                     | 0.398   | <b>0.028</b> |
| SFS Total                                                   | 0.143   | 0.629        |
| BACS Composite Score                                        | -0.079  | 0.629        |

**Notes:** Covaried for age, sex, race, site, and total intracranial volume; q-value indicates FDR corrected pvalue. Axis IIR, Axis II Relatives; NC, normal controls; SFS, Social Functioning Scale; BACS, Brief Assessment of Cognition in Schizophrenia.

**Supplementary Table S6: Structural Covariance Between Total Choroid Plexus Volume and Clinical Variables in Probands.**

| Measure               | Probands |         |
|-----------------------|----------|---------|
|                       | r-value  | q-value |
| PANSS Negative Total  | 0.025    | 0.557   |
| PANSS Positive Total  | 0.068    | 0.452   |
| Age of Onset          | 0.035    | 0.557   |
| Daily CPZ Equivalents | 0.053    | 0.557   |

**Notes:** All data adjusted for age, sex, race, and site. Choroid plexus also adjusted for total intracranial volume. P values were FDR corrected for multiple comparisons. PANSS, Positive and Negative Symptom Scale. CPZ, chlorpromazine.

**Supplementary Table S7: Structural Covariance Between Total Choroid Plexus Volume and Social Functioning and Cognition in Probands, Relatives and Controls**

| Measure               | Probands |              | Relatives |         | NC      |         |
|-----------------------|----------|--------------|-----------|---------|---------|---------|
|                       | r-value  | q-value      | r-value   | q-value | r-value | q-value |
| SFS Total             | -0.075   | 0.122        | -0.026    | 0.841   | -0.047  | 0.933   |
| BACS Total            | -0.110   | <b>0.022</b> | 0.009     | 0.841   | 0.005   | 0.933   |
| BACS Verbal Memory    | -0.046   | 0.284        | 0.040     | 0.990   | 0.028   | 0.760   |
| BACS Digit Sequencing | -0.084   | 0.106        | -0.013    | 0.990   | 0.016   | 0.781   |
| BACS Token Motor      | -0.061   | 0.197        | -0.059    | 0.990   | -0.036  | 0.760   |
| BACS Verbal Fluency   | -0.132   | <b>0.013</b> | -0.005    | 0.990   | 0.042   | 0.760   |
| BACS Symbol Coding    | -0.109   | <b>0.034</b> | -0.002    | 0.990   | -0.028  | 0.760   |
| BACS Tower of London  | -0.068   | 0.177        | -0.001    | 0.990   | -0.027  | 0.760   |

**Notes:** All data adjusted for age, sex, race, and site. Choroid plexus also adjusted for total intracranial volume. NC, Normal Controls; SFS, Social Functioning Scale; BACS, Brief Assessment of Cognition. q values FDR corrected for multiple comparisons (q-value).

**Supplementary Table S8: Structural Covariance Between Total Choroid Plexus Volume and Brain Structure in Probands, Relatives and Controls**

| Region (Volume)   | Probands |                  | Relatives |                  | NC      |                  |
|-------------------|----------|------------------|-----------|------------------|---------|------------------|
|                   | r-value  | q-value          | r-value   | q-value          | r-value | q-value          |
| Total Gray Matter | -0.152   | <b>&lt;0.001</b> | -0.202    | <b>&lt;0.001</b> | -0.113  | 0.078            |
| Lateral Ventricle | 0.549    | <b>&lt;0.001</b> | 0.566     | <b>&lt;0.001</b> | 0.606   | <b>&lt;0.001</b> |
| Cerebellum Cortex | 0.051    | 0.227            | -0.070    | 0.112            | 0.012   | 0.821            |
| Hippocampus       | -0.050   | 0.243            | -0.094    | <b>0.049</b>     | 0.057   | 0.360            |
| Amygdala          | -0.143   | <b>0.001</b>     | -0.149    | <b>0.001</b>     | -0.087  | 0.171            |
| Caudate           | 0.051    | 0.229            | 0.070     | 0.112            | 0.140   | <b>0.032</b>     |

**Notes:** NC, Normal Controls. All data adjusted for age, sex, race, site and total intracranial volume.

**Supplementary Table S9: Analyte Correlations with Choroid Plexus Volume by Group and Coefficient of Variation for All Subjects**

|         | Units   | Probands |              | SZP    |       | SADP   |       | BPP    |              | NC     |              | CV All Subjects |         |
|---------|---------|----------|--------------|--------|-------|--------|-------|--------|--------------|--------|--------------|-----------------|---------|
|         |         | r        | p            | r      | p     | r      | p     | r      | p            | r      | p            | Mean (SD)       | Range   |
| TNFa    | (pg/mL) | -0.045   | 0.642        | -0.188 | 0.271 | -0.114 | 0.604 | 0.059  | 0.690        | 0.078  | 0.562        | 2.7 (2.5)       | 0-16    |
| sFlt1   | (pg/mL) | -0.054   | 0.581        | 0.050  | 0.772 | -0.147 | 0.501 | -0.187 | 0.202        | 0.073  | 0.590        | 2.9 (3.6)       | 0.1-34  |
| VEGF    | (pg/mL) | -0.006   | 0.951        | -0.057 | 0.739 | -0.257 | 0.236 | 0.016  | 0.916        | 0.207  | 0.122        | 2.0 (2.9)       | 0-33    |
| CRP     | (ng/mL) | 0.003    | 0.979        | -0.133 | 0.439 | -0.112 | 0.611 | 0.117  | 0.429        | 0.098  | 0.468        | 2.1 (1.9)       | 0.1-9   |
| TGFb    | (pg/mL) | -0.083   | 0.479        | -0.267 | 0.170 | -0.156 | 0.564 | 0.077  | 0.679        | 0.055  | 0.727        | 2.9 (3.6)       | 0-32    |
| IL8     | (pg/mL) | 0.126    | 0.197        | 0.237  | 0.163 | -0.242 | 0.264 | 0.028  | 0.850        | -0.091 | 0.499        | 1.8 (1.8)       | 0-12    |
| IL2     | (pg/mL) | 0.058    | 0.569        | -0.122 | 0.490 | 0.014  | 0.957 | 0.147  | 0.341        | -0.062 | 0.680        | 30.7 (29.5)     | 0-129   |
| IL4     | (pg/mL) | 0.131    | 0.215        | 0.265  | 0.157 | 0.223  | 0.344 | -0.040 | 0.803        | -0.300 | <b>0.043</b> | 34.1 (30.3)     | 0-141   |
| IL12    | (pg/mL) | 0.120    | 0.220        | -0.037 | 0.829 | 0.068  | 0.757 | -0.048 | 0.743        | 0.016  | 0.906        | 2.2 (2)         | 0-15    |
| IL1b    | (pg/mL) | 0.062    | 0.527        | 0.172  | 0.313 | 0.341  | 0.112 | -0.225 | 0.125        | 0.108  | 0.423        | 27.6 (29.7)     | 0.5-140 |
| IL6     | (pg/mL) | 0.206    | <b>0.033</b> | 0.238  | 0.162 | -0.133 | 0.542 | 0.305  | <b>0.036</b> | 0.070  | 0.603        | 6.5 (7.1)       | 0-41    |
| IFNg    | (pg/mL) | 0.119    | 0.223        | 0.127  | 0.459 | -0.013 | 0.955 | 0.054  | 0.716        | 0.062  | 0.643        | 5.6 (5.8)       | 0-40    |
| IL10    | (pg/mL) | 0.129    | 0.186        | -0.092 | 0.594 | -0.071 | 0.747 | 0.355  | <b>0.014</b> | 0.090  | 0.503        | 10.5 (11.8)     | 0-114   |
| IL12p70 | (pg/mL) | -0.063   | 0.557        | -0.139 | 0.496 | 0.049  | 0.843 | -0.185 | 0.234        | -0.010 | 0.946        | 35.9 (30)       | 0-139   |

**Notes:** BPP, psychotic bipolar I disorder; SADP, schizoaffective; SZP, schizophrenia; NC, Normal Controls; CV, Coefficient of Variation; SD, standard deviation. Analyte data adjusted for age, sex, race, and storage days. CP volume adjusted for age, sex, race, and total intracranial volume. The bolded values stand for significant uncorrected p values (p<0.05)

**Supplementary Figure S1:** Choroid plexus volume correlations with BACS subscale scores in probands, first-degree relatives and healthy controls (NC). Partial correlations were adjusted for age, sex, race, site. Imaging data was additionally adjusted for total intracranial volume. FDR corrected q-values.

### Covariance Analysis Between Total Choroid Plexus Volume & BACS Subscores

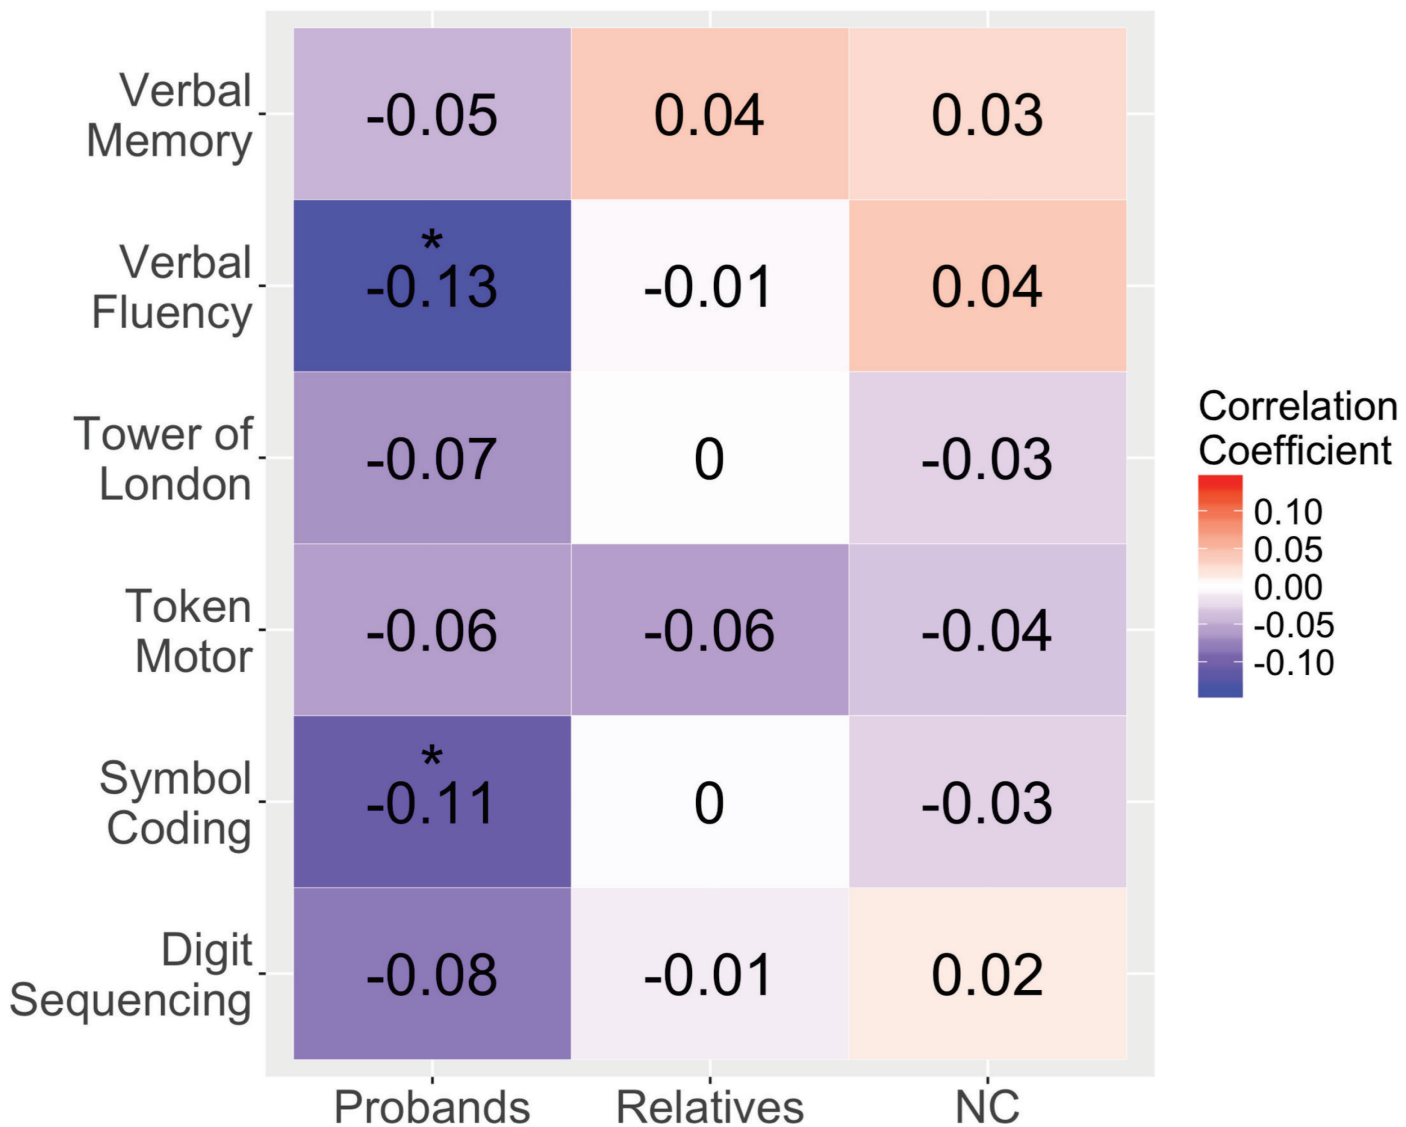

Supplement: appi.ajp.2019.18070825.ds001.pdf [file appi.ajp.2019.18070825.ds001.pdf]
